# Supplementary material
Source: ML conference proceedings conference paper supplement (https://openreview.net/forum?id=BRdYYyrAOR)

000 SUPPLEMENTARY MATERIAL FOR SUBMISSION:  
001  
002

003 RECONSTRUCTING TRAINING DATA FROM  
004 REAL WORLD MODELS TRAINED WITH  
005 TRANSFER LEARNING  
006  
007  
008

009 **Anonymous authors**

010 Paper under double-blind review  
011  
012  
013  
014

015 1 FULL RESULTS FOR FIG.5B FROM MAIN PAPER  
016

017 In Figure 5b in the main paper we show reconstructed samples, sorted according to their  
018 reconstruction-quality as measured by cosine-similarity between their image embeddings. The  
019 results shown there are obtained from a model trained on DINO embeddings on Food101 dataset.

020 Below we provide the complete results for this type of evaluation, namely, for each model from Figure  
021 3, and for each reconstruction-quality metric, we show the "best" reconstructed samples according to  
022 this metric (by sorting them).  
023

024 In total there are 8 models: trained on 4 backbones (ViT, DINO, DINOv2 and CLIP) and on 2  
025 datasets (Food101 and iNaturalist), as described in details in the Results Section in the main paper.  
026 And for each model we show the sorted results for a total of 6 choices for reconstruction-quality:  
027 Cosine-Similarity in Embedding space plus 5 metrics in Image space: SSIM, LPIPS, Split-Product,  
028 PSNR and Cosine-Similarity (Image space).

029 In each Figure below, images with RED borderline are original training images, and the image  
030 below them is their nearest reconstructed image (as measured by the cosine-similarity between their  
031 embeddings). Note: in all cases, the matching between a training image and its reconstructed image  
032 is the same. the only difference is between the way they are sorted – which is done using the metric  
033 (as written in the left side of each row).

034 We are aware that there may be some sampling bias in these results. However, since in our work, the  
035 inversion part is time-intensive, we must choose which embeddings to invert, where in our work we  
036 use the cosine-similarity for that, as detailed in the paper. It is not feasible to use an image-metric  
037 for this goal, because this would mean first inverting all candidate embeddings (usually 25k-50k of  
038 them), which is not feasible.  
039  
040  
041  
042  
043  
044  
045  
046  
047  
048  
049  
050  
051  
052  
053

054  
055  
056  
057  
058  
059  
060  
061  
062  
063  
064  
065  
066  
067  
068  
069  
070  
071  
072  
073  
074  
075  
076  
077  
078  
079  
080  
081  
082  
083  
084  
085  
086  
087  
088  
089  
090  
091  
092  
093  
094  
095  
096  
097  
098  
099  
100  
101  
102  
103  
104  
105  
106  
107

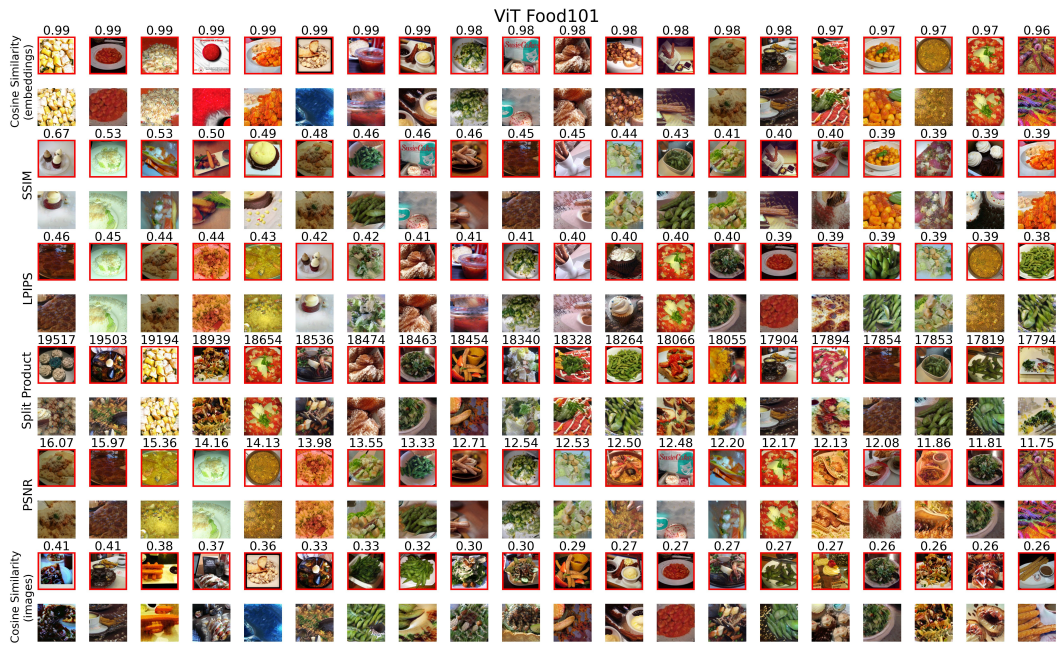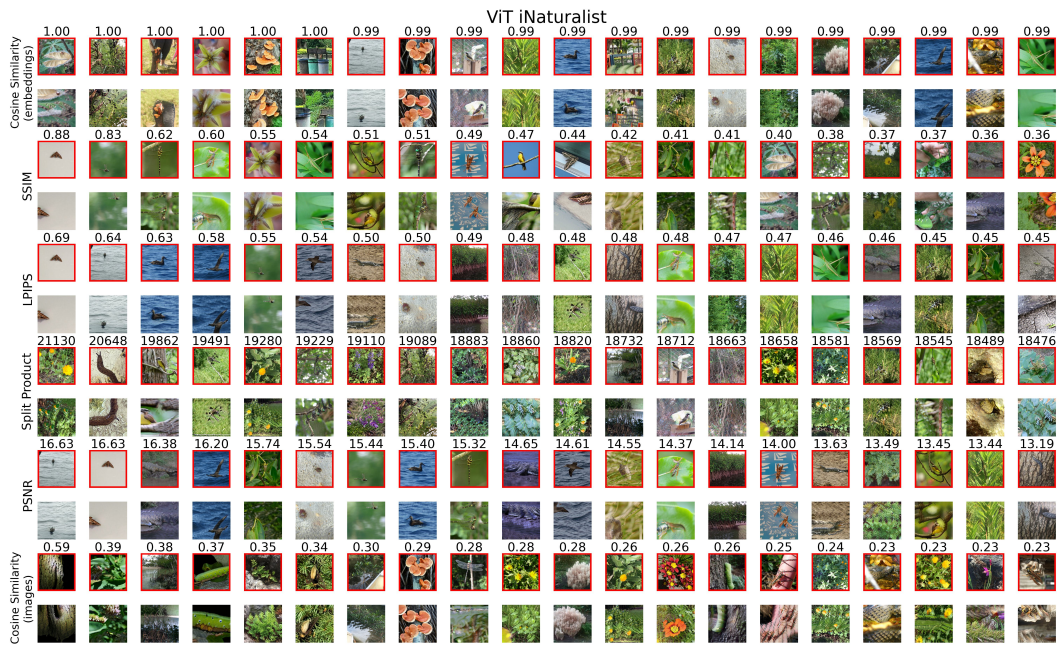

108  
109  
110  
111  
112  
113  
114  
115  
116  
117  
118  
119  
120  
121  
122  
123  
124  
125  
126  
127  
128  
129  
130  
131  
132  
133  
134  
135  
136  
137  
138  
139  
140  
141  
142  
143  
144  
145  
146  
147  
148  
149  
150  
151  
152  
153  
154  
155  
156  
157  
158  
159  
160  
161

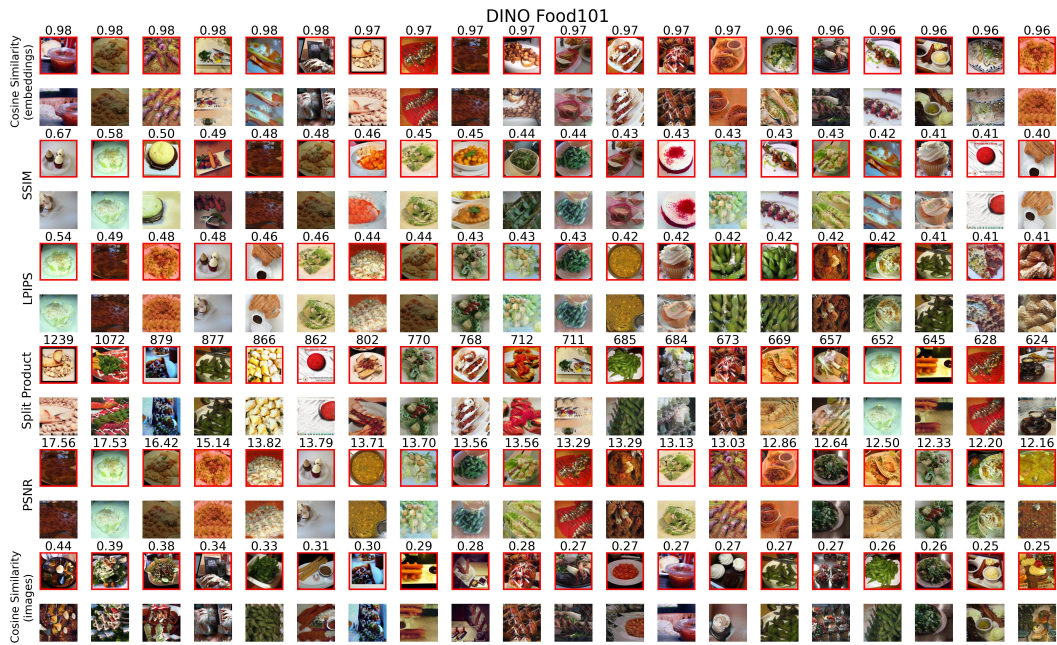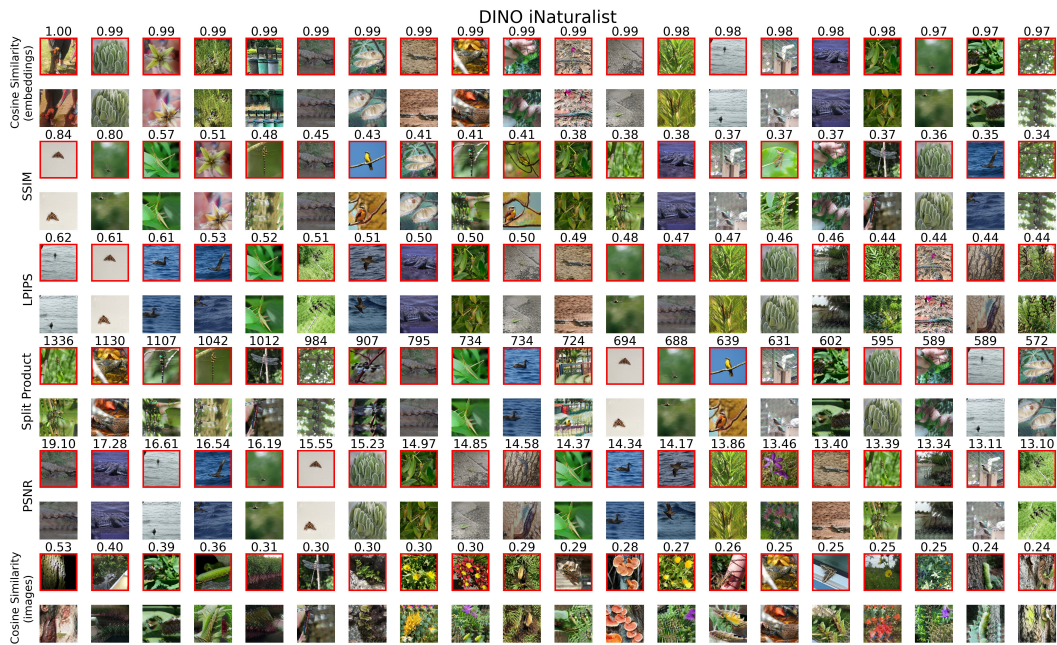

162  
163  
164  
165  
166  
167  
168  
169  
170  
171  
172  
173  
174  
175  
176  
177  
178  
179  
180  
181  
182  
183  
184  
185  
186  
187  
188  
189  
190  
191  
192  
193  
194  
195  
196  
197  
198  
199  
200  
201  
202  
203  
204  
205  
206  
207  
208  
209  
210  
211  
212  
213  
214  
215

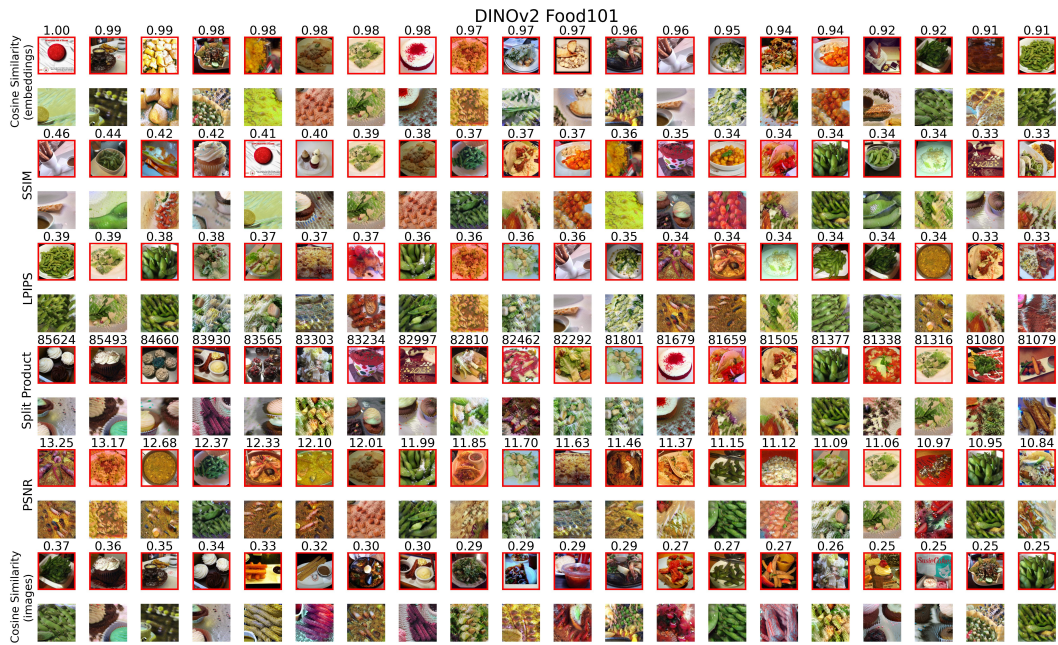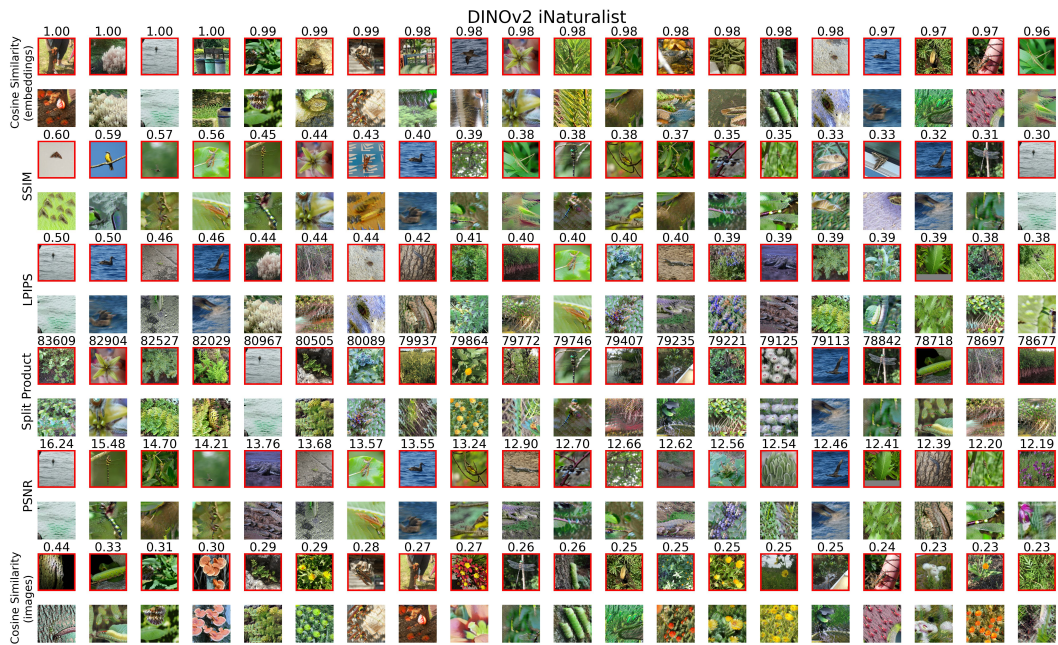

216  
217  
218  
219  
220  
221  
222  
223  
224  
225  
226  
227  
228  
229  
230  
231  
232  
233  
234  
235  
236  
237  
238  
239  
240  
241  
242  
243  
244  
245  
246  
247  
248  
249  
250  
251  
252  
253  
254  
255  
256  
257  
258  
259  
260  
261  
262  
263  
264  
265  
266  
267  
268  
269

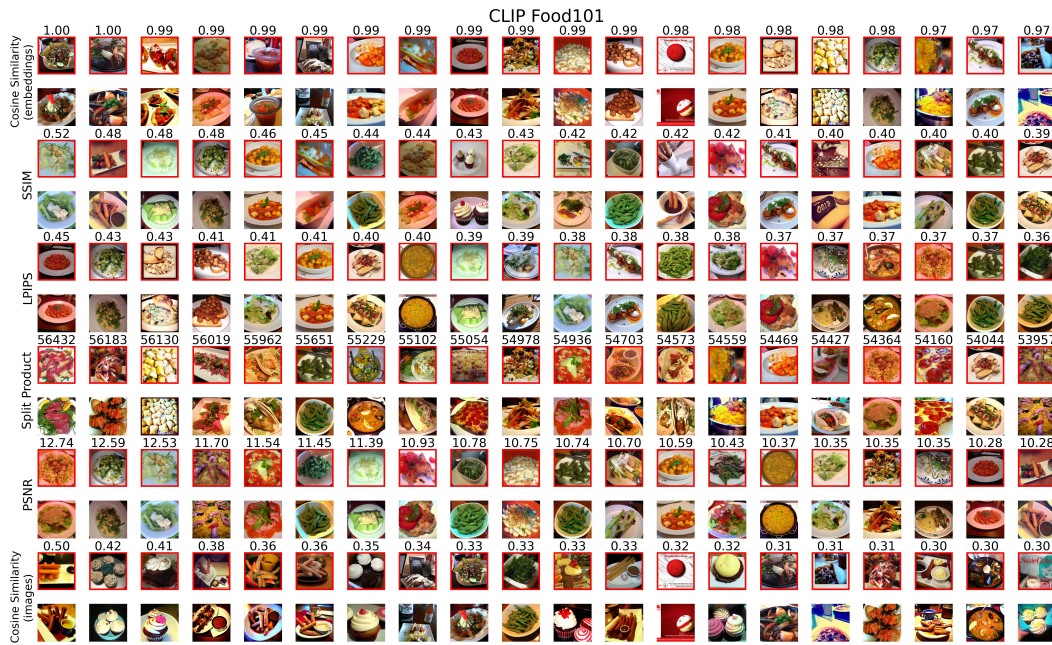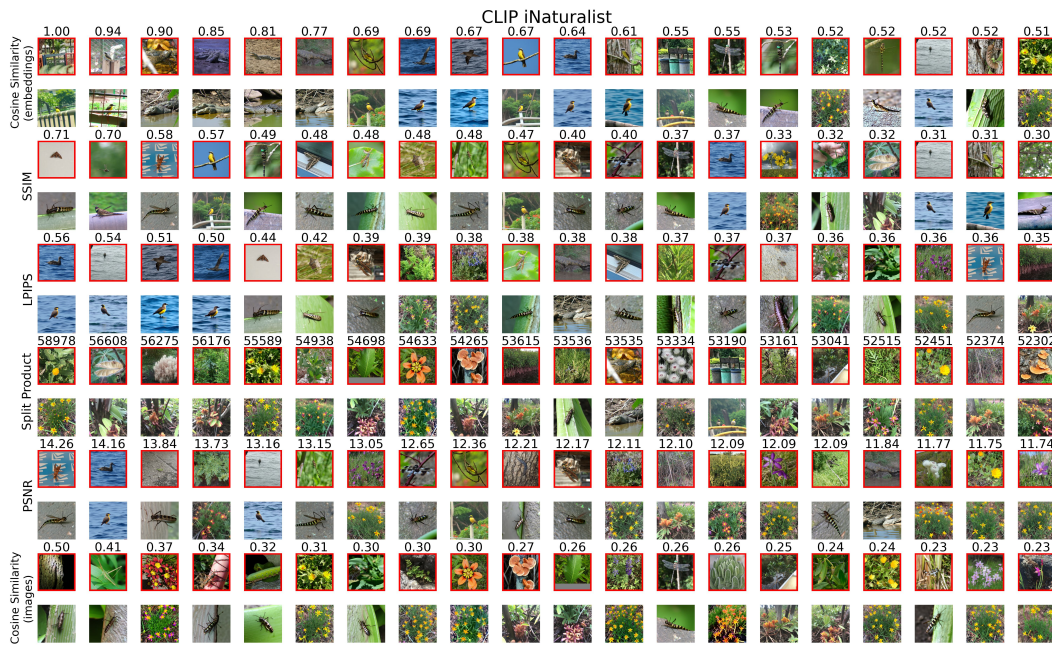

Supplement: supplementary_material [file attachment]
